# Supplementary material for: A graphene oxide scaffold-encapsulated microcapsule for polysulfide-immobilized long life lithium–sulfur batteries
Source: Royal Society of Chemistry journal article supplement (doi:10.1039/d2lc00161f), 2022-01-01
Supplement: d2lc00161f4.pdf [file d2lc00161f4.pdf]

Electronic Supplementary Information (ESI) for Chemical Communications. This journal is (c)  
The Royal Society of Chemistry 2022.

## Electronic Supplementary Information (ESI)

### A graphene oxide scaffold-encapsulated microcapsule for polysulfides-rocked long life lithium-sulfur batteries

Xirong Lin,<sup>‡,a</sup> Chaoyu Yang,<sup>‡,b</sup> Tianli Han,<sup>c</sup> Jinjin Li,<sup>\*,a</sup> Zhonghua Chen,<sup>\*,d</sup> Haikuo Zhang,<sup>a</sup> Kai Mu,<sup>b</sup> Ting Si,<sup>\*,b</sup> Jinyun Liu<sup>\*,c</sup>

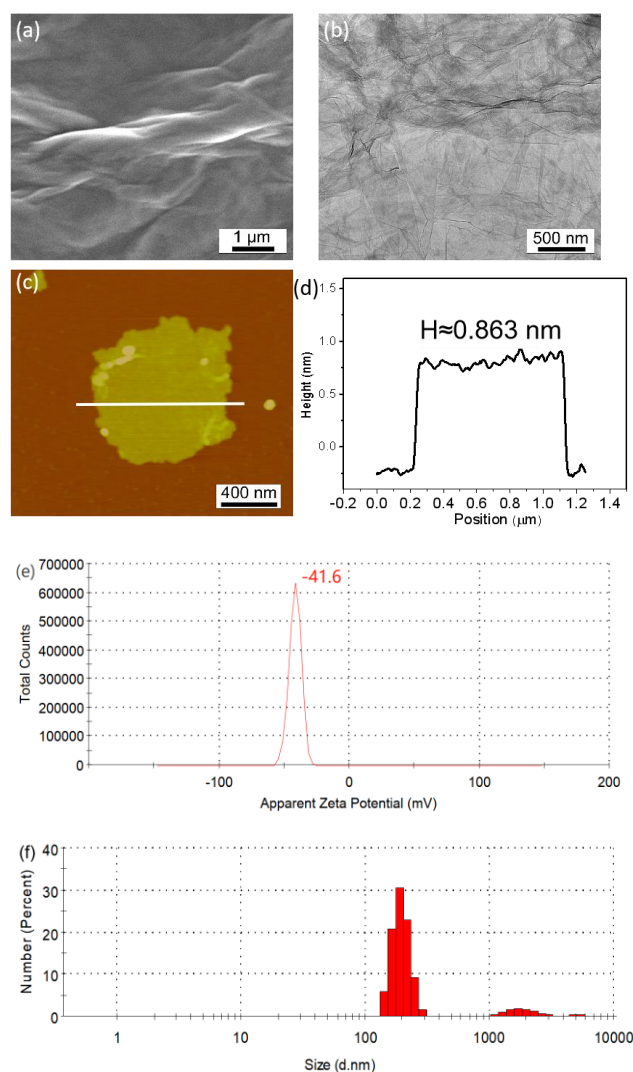

**Fig. S1** (a) SEM, (b) TEM, (c) AFM images, (d) height profile, (e) Zeta potential and (f) size distribution of the GO nanosheets.

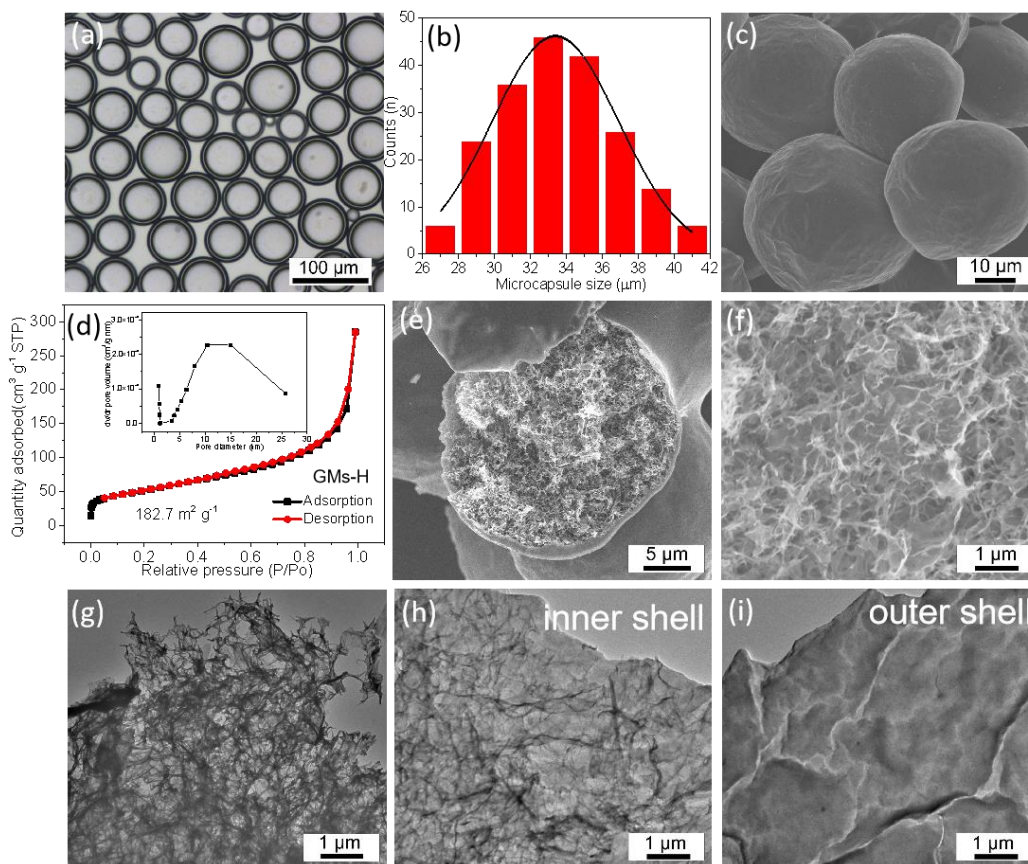

**Fig. S2** Characterizations of the GMs-H. The (a) optical image and (b) corresponding size-distribution of the microcapsules after UV-curing. (c) SEM image and (d) Nitrogen adsorption/desorption isotherms of GMs-H. Inset in (d) shows the pore-size distribution. (e) Cross-section SEM image of GMs-H. (f) SEM and (g) TEM images of inner core. TEM images of (h) inner and (i) outer shell of the GMs-H.

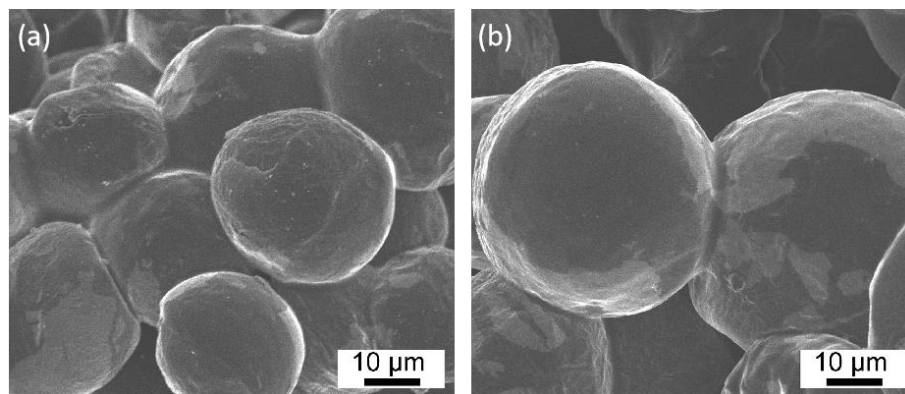

**Fig. S3** (a,b) SEM images of the GSMs-H.

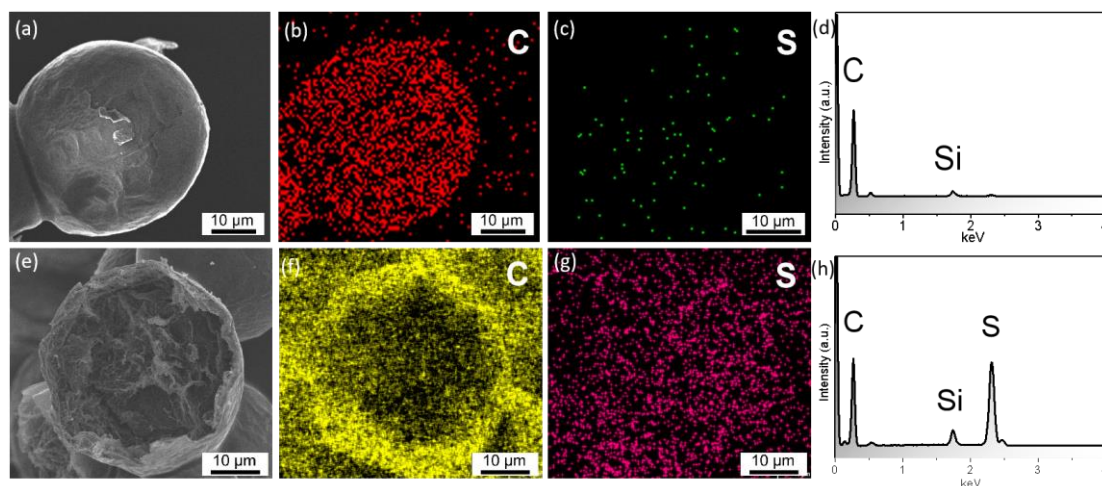

**Fig. S4** (a) SEM image, (b,c) elemental mapping, and (d) EDS spectrum of a GSMs-H. Inset in (a) presents the corresponding line-scanning curves. (e) SEM, (f,g) elemental mapping images, and (h) EDS spectrum of a manually-broken GSMs-H.

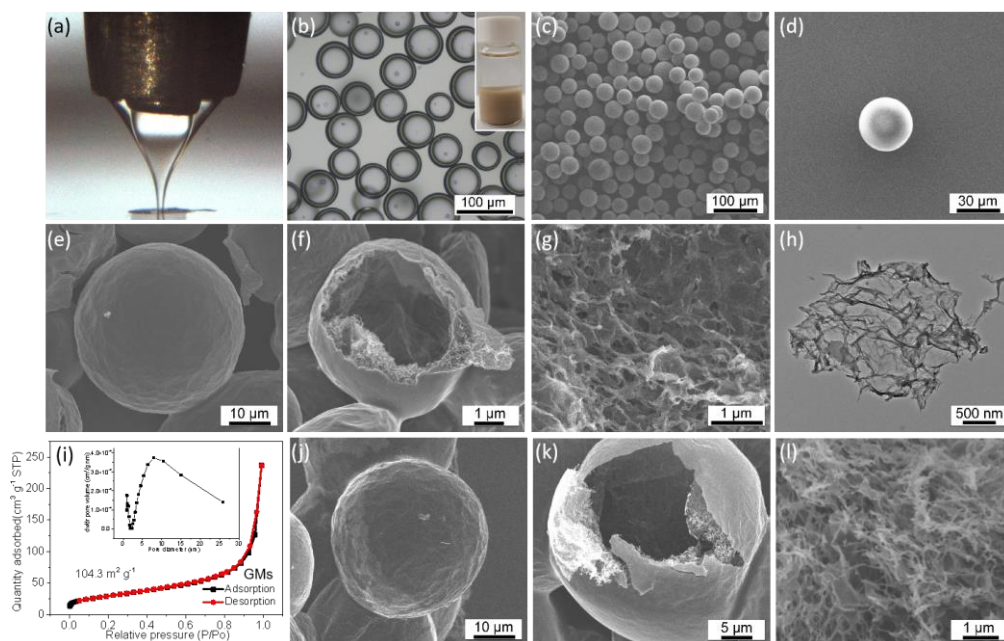

**Fig. S5** (a) Optical images of a stable cone. (b) Optical and (c, d) SEM images of the GSMs prepared by using a low concentration of GO solution ( $1 \text{ mg L}^{-1}$ ) after UV-curing. (e,f) SEM images of the GSMs. (g) SEM and (h) TEM images of inner core for the GSMs. (i)  $\text{N}_2$  adsorption/desorption isotherms and pore-size distribution of the GSMs. (j-l) SEM images of the GSMs and corresponding inner core after loading sulfur.

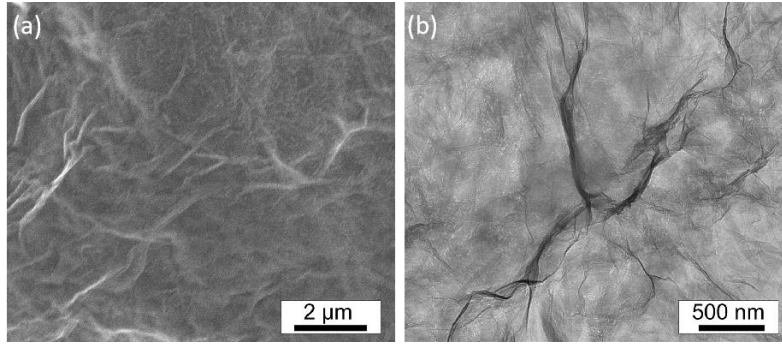

**Fig. S6** (a) SEM and (b) TEM images of the GSSs.

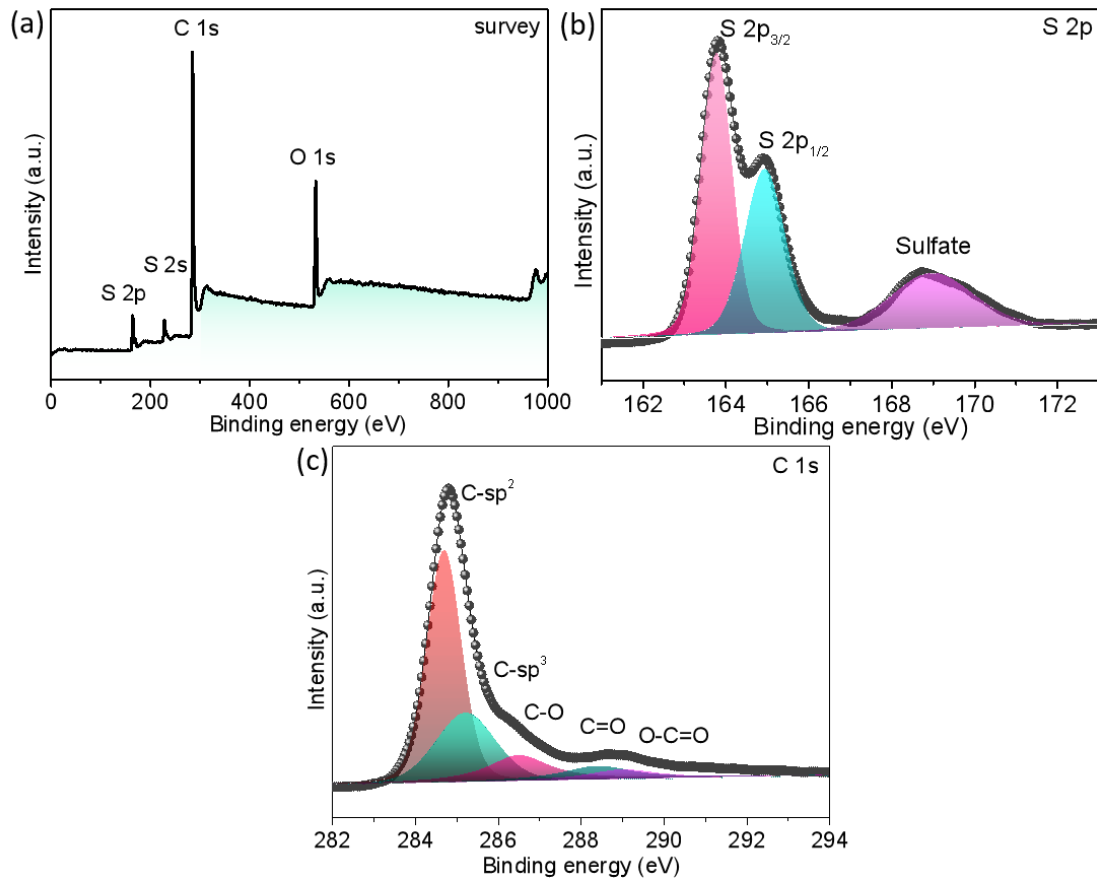

**Fig. S7** XPS spectra of the GSMs-H: (a) survey spectrum, (b) S 2p, and (c) C 1s.



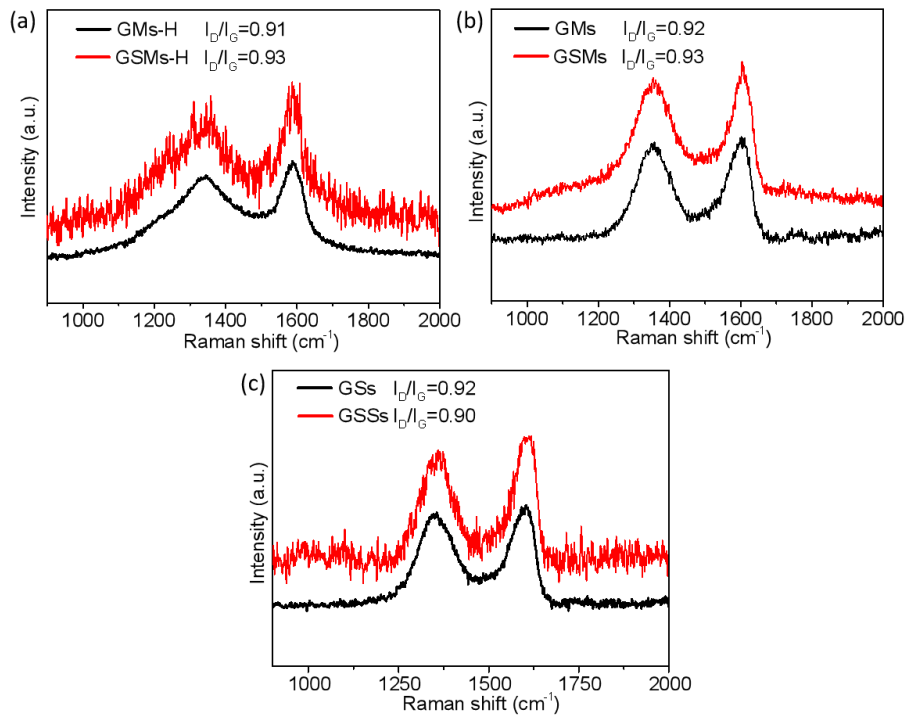

**Fig. S8** Raman spectra of the (a) GMs-H and GSMs-H, (b) GMs and GSMs, (c) GSs and GSSs.

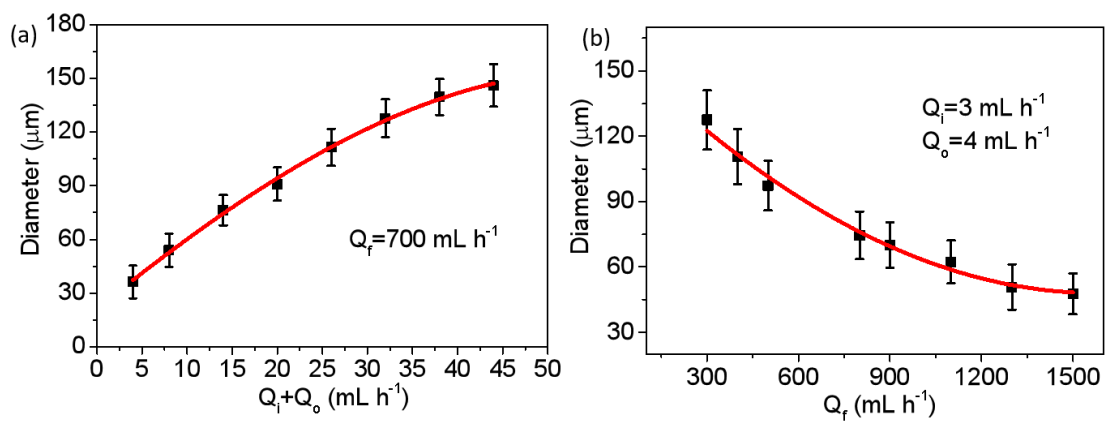

**Fig. S9** The relationship between diameter of GMs and flowing rates: (a)  $Q_i+Q_o$  and (b)  $Q_f$ .

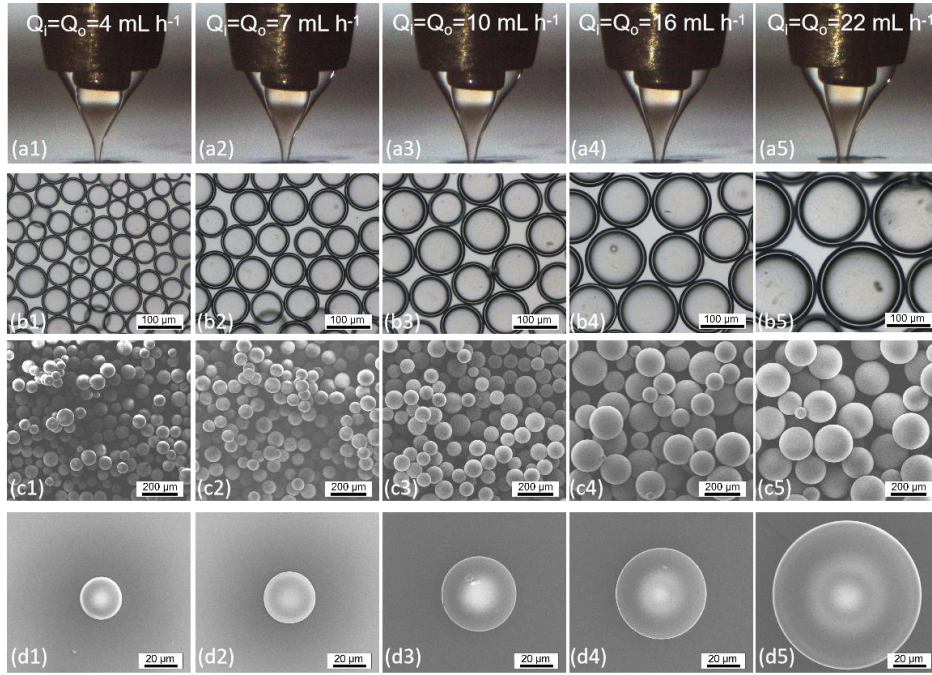

**Fig. S10** (a) The steady cone-jet structure and corresponding (b) optical, (c) low- and (d) high-magnification SEM images of the microcapsules. The liquid flow rate of  $Q_i$  is the same as  $Q_o$ , and the  $Q_f$  is fixed at 700 mL h<sup>-1</sup>.

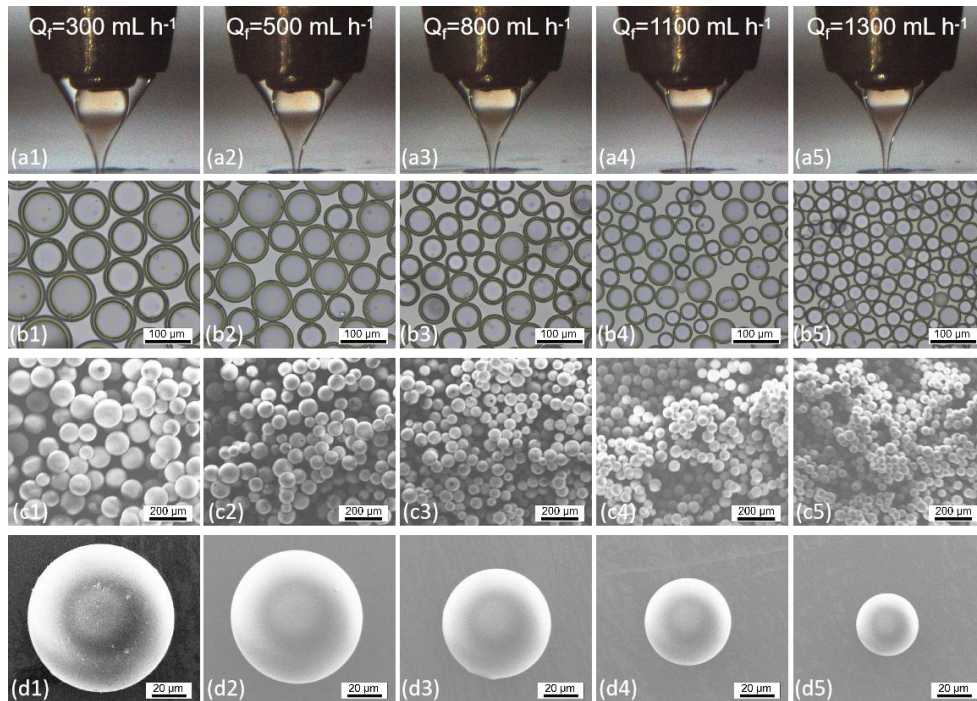

**Fig. S11** (a) The steady cone-jet structure and corresponding (b) optical, (c) low- and (d) high-magnification SEM images of the microcapsules. The liquid flow rate of  $Q_i$  is 3 mL h<sup>-1</sup> and  $Q_o$  is 4 mL h<sup>-1</sup>.

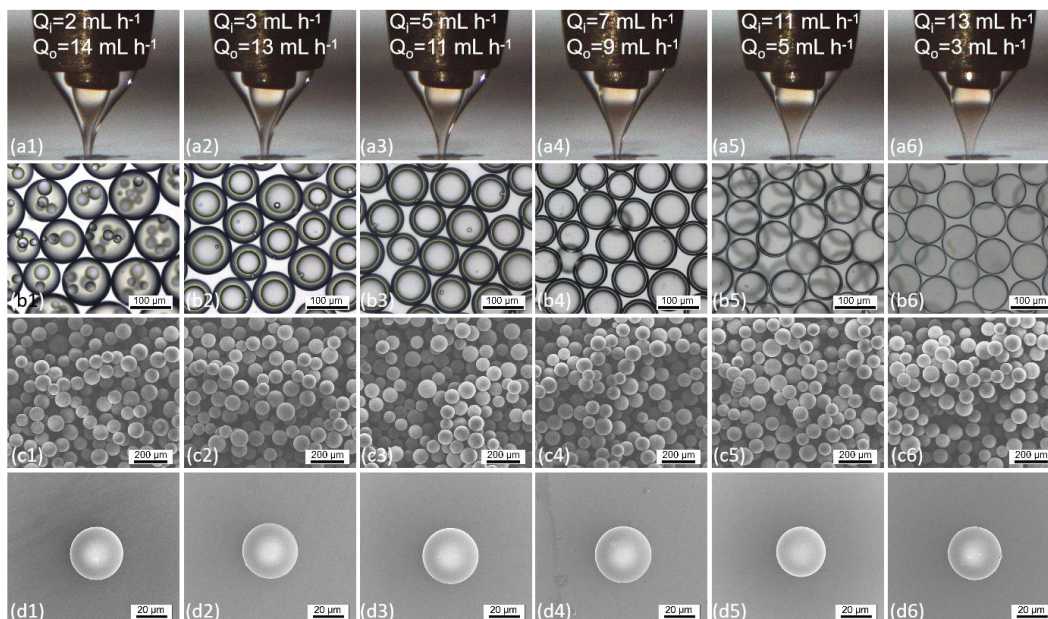

**Fig. S12** (a) The stable cone-jet mode changing with  $\phi$  ( $\phi=Q_i/Q_o$ ), and corresponding (b) optical, (c) low- and (d) high-magnification SEM images of the microcapsules. The sum of the liquid flow rates of the  $Q_i$  and  $Q_o$  are constant at  $16 \text{ mL h}^{-1}$ , and the  $Q_f$  maintains at  $700 \text{ mL h}^{-1}$ .

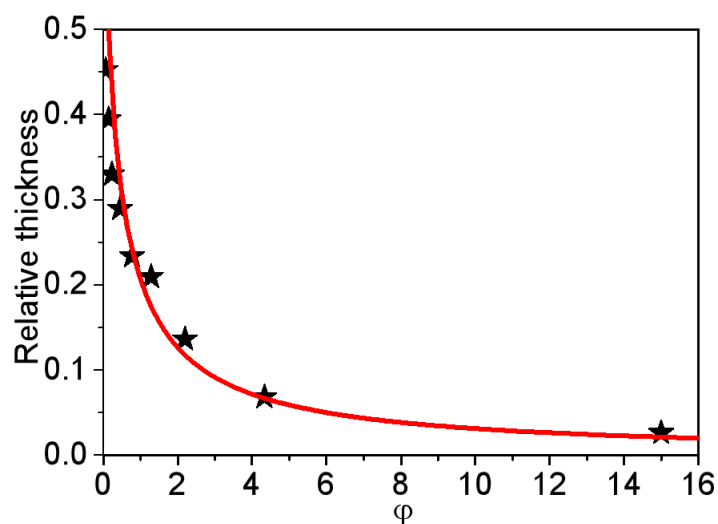

**Fig. S13** Relationship of relative thickness vs inner and outer phases ( $\phi=Q_i/Q_o$ ).

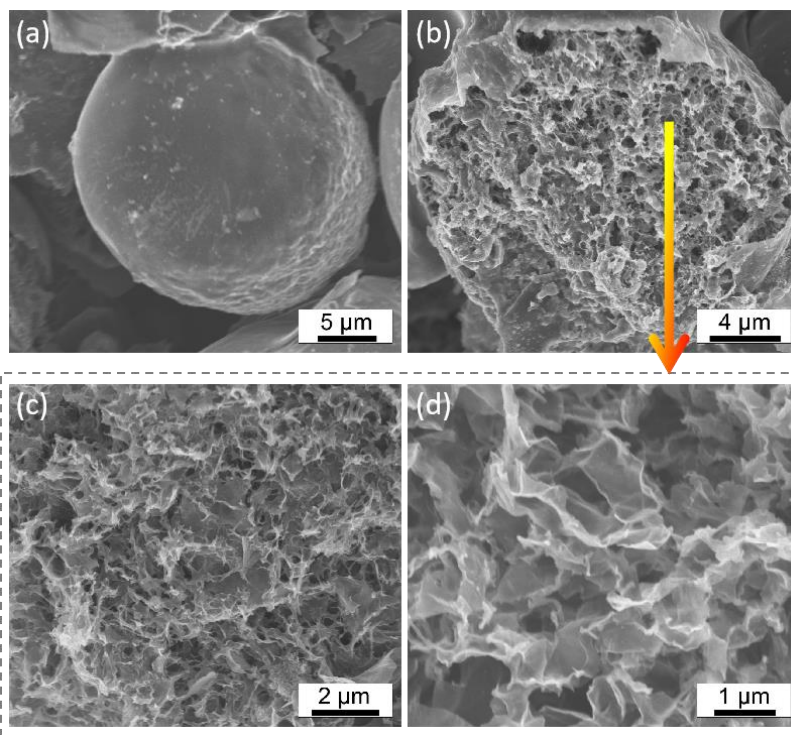

**Fig. S14** (a-d) SEM images of the GSMs-H after cycling at 0.2C for 200 cycles.

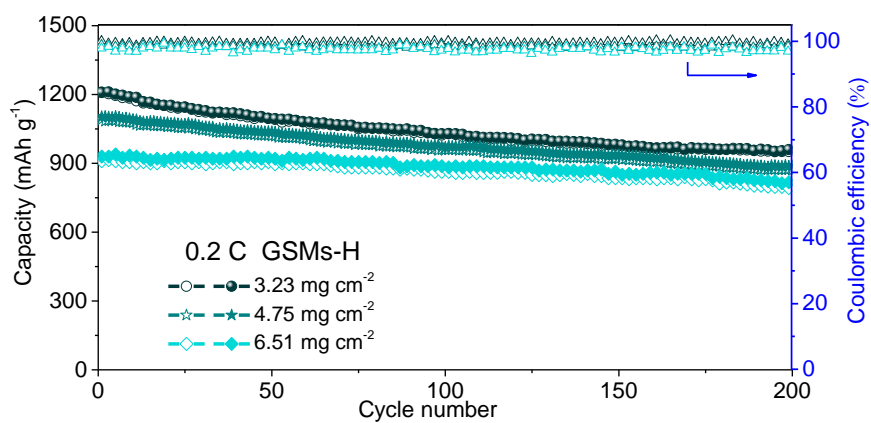

**Fig. S15** Cycling capacity of GSMs-H sample with different sulfur loadings.



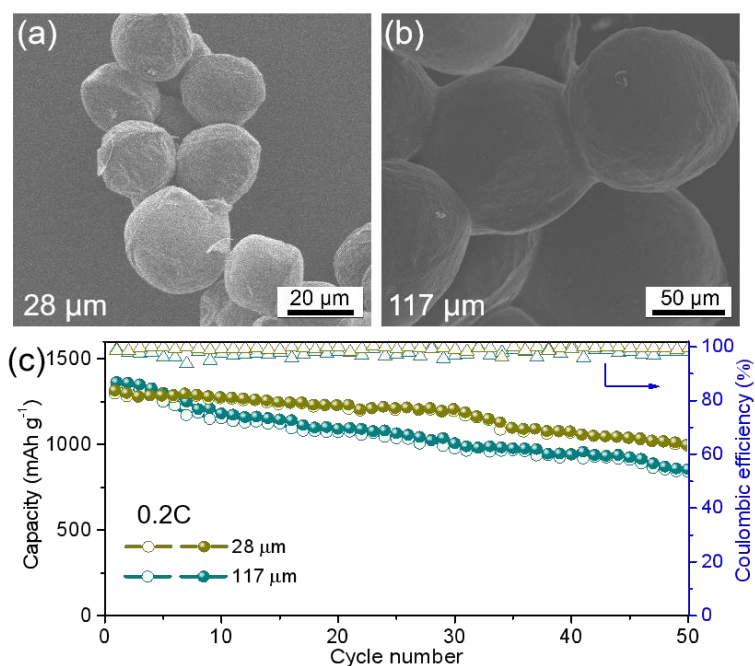

**Fig. S16** SEM images of the GSMs-H for the diameters of (a) 28  $\mu\text{m}$  (liquid flow rate:  $Q_i=2\text{ mL h}^{-1}$ ,  $Q_o=2\text{ mL h}^{-1}$ ,  $Q_f=700\text{ mL h}^{-1}$ ) and (b) 117  $\mu\text{m}$  (liquid flow rate:  $Q_i=3\text{ mL h}^{-1}$ ,  $Q_o=4\text{ mL h}^{-1}$ ,  $Q_f=300\text{ mL h}^{-1}$ ). (c) Cycling performance at 0.2C.

**Table S1.** Comparison on the cycling performance of some GO-based cathodes.

| Cathode                   | Synthetic method             | Cycling rate           | Cycle number | Capacity ( $\text{mAh g}^{-1}$ ) | Ref. |
|---------------------------|------------------------------|------------------------|--------------|----------------------------------|------|
| GO paper/S                | Modified Hummers' method     | $100\text{ mA g}^{-1}$ | 40           | 565                              | 1    |
| Mg ZIF-67/<br>CNT@GO/S    | Spray drying                 | 0.1C                   | 50           | 641                              | 2    |
| SrTiO <sub>3</sub> @rGO/S | Hydrothermal method          | 1C                     | 600          | 820                              | 3    |
| NiS <sub>2</sub> /rGO/S   | Microwave-assisted method    | 1C                     | 800          | 400                              | 4    |
| MnS/(N/S)-rGO/S           | Hydrothermal process         | 0.2C                   | 200          | 817                              | 5    |
| COF@GO/S                  | Spray-drying process         | 1C                     | 500          | 601                              | 6    |
| Co/NrGO/S                 | Modified Hummers' method     | 0.2C                   | 250          | 905                              | 7    |
| 3D N-doped<br>rGO/Co-Ni-S | One-step hydrothermal method | 1C                     | 350          | 700                              | 8    |

|                                 |                              |            |             |             |           |
|---------------------------------|------------------------------|------------|-------------|-------------|-----------|
| N, S-doped graphene             | <i>In situ</i> self-assembly | 1C         | 500         | 622         | 9         |
| S/Cr-Ni-NDs@G                   | Hydrothermal reaction        | 1C         | 500         | 682         | 10        |
| Co@TiO <sub>2</sub> /GO/S       | Hydrothermal reaction        | 1C         | 500         | 807         | 11        |
| Co-LDH@rGO/S                    | Spray-drying process         | 1C         | 600         | 600         | 12        |
| GO/S-encapsulated microcapsules | Co-flow focusing approach    | 0.2C<br>1C | 200<br>1000 | 1004<br>800 | This work |

## Reference

- 1 M. Hakimi, Z. Sanaee, S. Ghasemi and S. Mohajerzadeh, *J. Phys. D: Appl. Phys.*, 2022, **55**, 165504.
- 2 J. Jiang, H. Wang, J. Zhao, J. Li, G. Liu and Y. Zhang, *J. Alloy compd.*, 2022, **899**, 163240.
- 3 X. He, Z. Lei, H. Liu, S. Wang, T. Qiao and X. Wang, *J. Alloy compd.*, 2022, 898, 162987.
- 4 Y. Li, J. Chen, Y. Zhang, Z. Yu, T. Zhang, W. Ge and L. Zhang, *J. Alloy compd.*, 2018, **766**, 804-812.
- 5 Z. Li, R. Xu, S. Deng, X. Su, W. Wu, S. Liu and M. Wu, *Appl. Surf. Sci.*, 2018, **433**, 10-15.
- 6 Z. Hu, G. Yan, J. Zhao, X. Zhang, Y. Feng, X. Qu, H. Ben, J. Shi, *Nanotechnology* 2022, 12, 4568.
- 7 L. Gai, C. Zhao, Y. Zhang, Z. Hu and Q. Shen, *Carbon Energy* 2022, 3, 115.
- 8 P. Wu, L. Tan, X. Wang, P. Liao, Z. Liu, P. P. Hou, Q. Y. Zhou, X. J. Jin, M. C. Li and X. R. Shao, *Mater. Res. Bull.*, 2022, **145**, 111550.
- 9 X. Li, Y. Yu, Z. Tang, Y. Yang, Y. Li, J. Cao and L. Chen, *Phys. Chem. Chem Phys.*, 2022, **24**, 2879-2886.
- 10 J. Zhang, S. Zheng, D. Sun, J. Li and G. Liu, *J. Electroanal. Chem.*, 2021, **902**, 115810.
- 11 X. Zhang, T. Wan, A. Jia, J. Li, G. Liu, D. Sun and Y. Wang, *Electrochim. Acta* 2021, **397**, 139264.
- 12 R. Xiao, W. Qiu, M. Yang, Y. Zhang and X. Wang, *ACS Appl. Mater. Sci.*, 2021, **4**, 12623-12630.
